# Supplementary material for: Mechanistic explanation and influence of molecular structure on chemical degradation and toxicity reduction by hydroxyl radicals
Source: Royal Society of Chemistry journal article supplement (doi:10.1039/d4ra00827h), 2024-01-01
Supplement: d4ra00827h1.pdf [file d4ra00827h1.pdf]

## Supporting Information

### **Mechanistic explanation and influence of molecular structure on chemical degradation and toxicity reduction by hydroxyl radicals**

You-Yi Lee, Hao-Chien Cheng, Chihhao Fan\*

Department of Bioenvironmental Systems Engineering,  
National Taiwan University, Taipei, Taiwan

Corresponding Author

Chihhao Fan  
Email: [chfan@ntu.edu.tw](mailto:chfan@ntu.edu.tw)

**Table S1** Kinetic parameters for Fenton oxidation of ACT, BPA, and TC at ferrous ion concentration of 0.5 mM and varying concentrations of H<sub>2</sub>O<sub>2</sub>.

| Compound | H <sub>2</sub> O <sub>2</sub> concentration (mM) | C <sub>0</sub> | C <sub>equil</sub> | k (min <sup>-1</sup> ) | R <sup>2</sup> |
|----------|--------------------------------------------------|----------------|--------------------|------------------------|----------------|
| ACT      | 0.1                                              | 50.01          | 34.84              | 1.730                  | 0.9990         |
|          | 0.3                                              | 49.74          | 21.05              | 1.688                  | 0.9937         |
|          | 0.5                                              | 49.87          | 8.42               | 2.464                  | 0.9977         |
| BPA      | 0.1                                              | 49.99          | 35.48              | 2.887                  | 0.9998         |
|          | 0.3                                              | 49.71          | 24.74              | 1.612                  | 0.9877         |
|          | 0.5                                              | 50.05          | 10.46              | 2.361                  | 0.9997         |
| TC       | 0.1                                              | 49.98          | 11.41              | 3.311                  | 0.9994         |
|          | 0.3                                              | 50.00          | 8.12               | 3.716                  | 0.9998         |
|          | 0.5                                              | 50.00          | 4.80               | 6.500                  | 0.9978         |

Note: C<sub>0</sub> is the initial concentration of the target compound at 0 min; C<sub>equil</sub> is the target compound concentration when achieved Fenton equilibrium; k is the first-order kinetic rate constant; R<sup>2</sup> indicates the goodness of kinetic model fitting.

**Table S2** Fukui function value of ACT (H atom data not shown)<sup>1</sup>

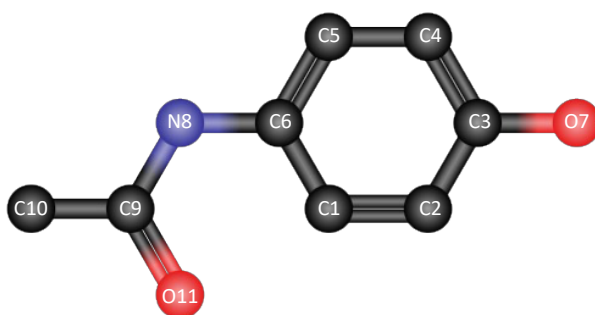

| Atom | $f^+$   | $f^-$   | $f^0$   |
|------|---------|---------|---------|
| C1   | 0.0201  | -0.8000 | 0.3899  |
| C2   | 0.0658  | -0.0096 | -0.0282 |
| C3   | 0.0872  | -0.0043 | -0.0415 |
| C4   | 0.0321  | -0.0070 | -0.0125 |
| C5   | -0.0242 | 0.1226  | -0.0492 |
| C6   | 0.0895  | 1.0672  | -0.5784 |
| O7   | 0.0772  | 0.0263  | -0.0518 |
| N8   | 0.0981  | -0.3863 | 0.1441  |
| C9   | -0.0145 | 0.8288  | -0.4071 |
| C10  | 0.0282  | -0.3956 | 0.1837  |
| O11  | 0.1409  | 0.2357  | -0.1883 |

**Table S3** Fukui function value of BPA (H atom data not shown)<sup>2</sup>

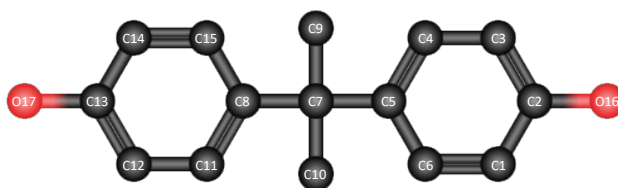

| Atom | $f^+$ | $f^-$ | $f^0$ |
|------|-------|-------|-------|
| C1   | 0.068 | 0.039 | 0.053 |
| C2   | 0.032 | 0.059 | 0.045 |
| C3   | 0.065 | 0.053 | 0.059 |
| C4   | 0.06  | 0.037 | 0.048 |
| C5   | 0.016 | 0.052 | 0.034 |
| C6   | 0.056 | 0.036 | 0.046 |
| C7   | 0.002 | 0.006 | 0.004 |
| C8   | 0.016 | 0.052 | 0.034 |
| C9   | 0.008 | 0.011 | 0.01  |
| C10  | 0.008 | 0.011 | 0.01  |
| C11  | 0.056 | 0.036 | 0.046 |
| C12  | 0.068 | 0.039 | 0.053 |
| C13  | 0.032 | 0.059 | 0.045 |
| C14  | 0.065 | 0.053 | 0.059 |
| C15  | 0.06  | 0.037 | 0.048 |
| O16  | 0.02  | 0.063 | 0.041 |
| O17  | 0.02  | 0.063 | 0.041 |

**Table S4** Fukui function value of TC (H atom data not shown)<sup>3</sup>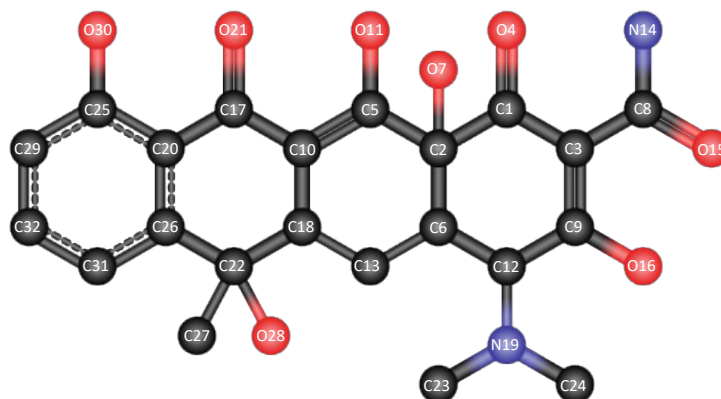

| Atom | $f^+$   | $f^-$   | $f^0$  | Atom | $f^+$   | $f^-$   | $f^0$   |
|------|---------|---------|--------|------|---------|---------|---------|
| C1   | -0.0035 | 0.0062  | 0.0014 | C17  | 0.1069  | 0.0028  | 0.0548  |
| C2   | 0.0081  | 0.0036  | 0.0058 | C18  | 0.0023  | 0.0019  | 0.0021  |
| C3   | -0.0006 | 0.0195  | 0.0094 | N19  | -0.0005 | 0.2369  | 0.1182  |
| O4   | 0.0150  | 0.0351  | 0.0250 | C20  | 0.0122  | -0.0027 | 0.0048  |
| C5   | 0.0779  | -0.0113 | 0.0333 | O21  | 0.0899  | 0.0134  | 0.0517  |
| C6   | 0.0024  | 0.0066  | 0.0045 | C22  | 0.0023  | -0.0004 | 0.0009  |
| O7   | 0.0200  | 0.0152  | 0.0176 | C23  | 0.0048  | 0.0452  | 0.0250  |
| C8   | 0.0077  | 0.0133  | 0.0105 | C24  | 0.0031  | 0.0480  | 0.0255  |
| C9   | -0.0044 | 0.0072  | 0.0014 | C25  | 0.0367  | 0.0079  | 0.0223  |
| C10  | 0.0135  | 0.0009  | 0.0072 | C26  | 0.0370  | -0.0050 | 0.0160  |
| O11  | 0.0623  | 0.0017  | 0.0320 | C27  | 0.0085  | 0.0022  | 0.0053  |
| C12  | -0.0018 | 0.0194  | 0.0088 | O28  | 0.0099  | -0.0154 | -0.0028 |
| C13  | 0.0052  | 0.0050  | 0.0051 | C29  | 0.0387  | 0.0139  | 0.0263  |
| N14  | 0.0122  | 0.0252  | 0.0187 | O30  | 0.0407  | 0.0138  | 0.0272  |
| O15  | 0.0156  | 0.0231  | 0.0194 | C31  | 0.0285  | 0.0063  | 0.0174  |
| O16  | 0.0125  | 0.0110  | 0.0118 | C32  | 0.0714  | 0.0133  | 0.0424  |

## REFERENCES

- (1) Qutob, M.; Hussein, M. A.; Alamry, K. A.; Rafatullah, M. A review on the degradation of acetaminophen by advanced oxidation process: pathway, by-products, biotoxicity, and density functional theory calculation. *RSC Advances* **2022**, *12* (29), 18373-18396, 10.1039/D2RA02469A. DOI: 10.1039/D2RA02469A.
- (2) Lee, J.; Eom, S.; Sohn, S.; Kim, T.; Zoh, K.-D. Degradation of bisphenol A, bisphenol S, and bisphenol AF in the UV-LED/chlorine reaction: Effect of pH on the kinetics, transformation products, and degradation pathway. *Chemical Engineering Journal* **2023**, *470*, 144041. DOI: <https://doi.org/10.1016/j.cej.2023.144041>.
- (3) Fang, C.; Wang, S.; Xu, H.; Huang, Q. Degradation of tetracycline by atmospheric-pressure non-thermal plasma: Enhanced performance, degradation mechanism, and toxicity evaluation. *Science of The Total Environment* **2022**, *812*, 152455. DOI: <https://doi.org/10.1016/j.scitotenv.2021.152455>.
